# Supplementary material for: Diversification of the AlpB Outer Membrane Protein of Helicobacter pylori Affects Biofilm Formation and Cellular Adhesion
Source: PubMed Central journal article supplement (PMC5331671; doi:10.1128/jb.00729-16), 2017-02-28
Supplement: JB.00729-16_zjb999094334s1.pdf [file JB.00729-16_zjb999094334s1.pdf]

```

1402 1:MKQNLKPFKMIKENLMTQSQKVRFLAPLSLALSLSFNQVGAEEDGGFMTFGYELGQVVQQ 60
1029 1:MKQNFKPFKMIKENLMTQSQKVRFLAPLSLALSLSFNQVGAEEDGGFMTFGYELGQVVQQ 60
2003 1:MKQNLKPFKMIKENLMTQSQKVRFLAPLSLALSLSFNQVGAEEDGGFMTFGYELGQVVQQ 60
11638 1:MKQNLKPFKMIKEDLMTQSQKVRFLAPLSLALSLSFNQVGAEEDGGFMTFGYELGQVVQQ 60
      *****
1402 61:VKNPGKIKAEELAGLLNSTTTNNTNINIAGTGGNVAGTLGNLFMNQLGNIIDLYPTLNTS 120
1029 61:VKNPGKIKAEELAGLLNSTTTNNTNINIAGTGGNVAGTLGNLFMNQLGNIIDLYPTLNTS 120
2003 61:VKNPGKIKAEELAGLLNSTTTNNTNINIAGTGGNVAGTLGNLFMNQLGNIIDLYPTLNTS 120
11638 61:VKNPGKIKAEELAGLLNSTTTNNTNINIAGTGGNVAGTLGNLFMNQLGNIIDLYPTLNTS 120
      *****
1402 121:SIHQCGSGSTNGATTAATSSSTNSPCFQGNLSLYNEMVSSIKTSLSQDLKNNIFQGNNT 180
1029 121:SIHQNSGS---SSTAAAT--TSSSPCFQGNLSLYNEMVSSIKTSLSQDLKNNIFQGNNT 175
2003 121:NIHQNSGS-NGSTTAAAT--TSSSCFQGNLSLYNEMVSSIKTSLSQDLKNNIFQGNNT 177
11638 121:SIHQCSATN-SGSSGATAAAATSNNPCFQGNLALYNKMGVSIKTSLSQNISKNIIFQGNNT 179
      *****
      *****
1402 181:TSANLSNQLSELNTASVYLYMNSFLNANNQAGGIFQNNTNQYNGVTAQQIAYVLKQA 240
1029 176:TSANLSNQLSELNTASVYLYMNSFLNANNQAGGIFQNNTNQAYGNNVTAQQIAYVLKQA 235
2003 178:TSANLSNQLSELNTASVYLYMNSFLNANNQAGGIFQNNTNQAYGNGVTAQQIAYVLRQA 237
11638 180:TSQNLNQLSELNTASVYLYMNSFLNANNQAGGIFQNHTNQAYGNGVTAQQIAYILKQA 239
      *****
1402 241:SITMGPSGNGGAAGAFDAALAQHVFNSANAGNDLSAKEFTSLVQNIIVNTSNNALTLANN 300
1029 236:SITMGPSGNSGAAGAFDAALAQHVFNSANAGNDLSAKEFTSLVQNIIVNTSNNALTLANN 295
2003 238:SITMGPSGNGGAAGAFDAALAQHVFNSANAGNDLSAKEFTSLVQNIIVNTSQNALTLANN 297
11638 240:SITMGPSGDSGAAAAGAFDAALAQHVFNSANAGNDLSAKEFTSLVQNIIVNNSQNALTLANN 299
      *****
1402 301:ANISNSTGYQVSYGGNIDQARSTQLLNNTTNTLAKVTALNNEKLANPWLGNFAAGNSSQV 360
1029 296:ANISNSTGYQVSYGGXIDQARSTQLLNNTTNTLAKVAALNNEKLANPWLGNFAAGNSSQV 355
2003 298:ANISNSTGYQVSYGGNIDQARSTQLLNNTTNTLAKVTALNNEKLANPWLGNFAAGNSSQV 357
11638 300:ANISNSTGYQVSYGGHIDQARSTQLLNNTTNTLAKVTALNNEKLANPWLGNFAAGNSSQV 359
      *****
1402 361:NAFNGFITKIGYKQFFGENKNVGLRYYGFFSYNGAGVGNPPTYNQVNLLTYGVGTDVLYN 420
1029 356:NAFNGFITKIGYKQFFGENKNVGLRYYGFFSYNGAGVGNPPTYNQVNLLTYGVGTDVLYN 415
2003 358:NAFNGFITKIGYKQFFGENKNVGLRYYGFFSYNGAGVGNPPTYNQVNLLTYGVGTDVLYN 417
11638 360:NAFNGFITKIGYKQFFGENKNVGLRYYGFFSYNGAGVGNPPTYNQVNLLTYGVGTDVLYN 419
      *****
1402 421:VFSRSFGSRSLNAGFFGGIQLAGDTYISTLRNSPQLASRPTATKFQFLFDVGLRMNFGIL 480
1029 416:VFSRSFGSRSLNAGFFGGIQLAGDTYISTLRNSPQLASRPTATKFQFLFDVGLRMNFGIL 475
2003 418:VFSRSFGSRSLNAGFFGGIQLAGDTYISTLRNSPQLASRPTATKFQFLFDVGLRMNFGIL 477
11638 420:VFSRSFGSRSLNAGFFGGIQLAGDTYISTLRNSPQLASRPTATKFQFLFDVGLRMNFGIL 479
      *****
1402 481:KKDLKSHNQHSIEIGVQIPTIYNTYKAGGAEVKYFRPYSVYWVYGYAF 529
1029 476:KKDLKSHNQHSIEIGVQVPTIYNTYKAGGAEVKYFRPYSVYWVYGYAF 524
2003 478:KKDLKSHNQHSIEIGVQIPTIYNTYKAGGAEVKYFRPYSVYWVYGYAF 526
11638 480:KKDLKSHNQHSIEIGVQIPTIYNTYKAGGAEVKYFRPYSVYWVYGYAF 528
      *****

```

Alignment of AlpB amino acid sequences in *H. pylori* strains used in this study (1402:TK1402, 1029:TK1029, 2003:KR2003, 11638:NCTC11638). The variable region corresponding to amino acid positions 121 to 146 of AlpB is shown in underline. The replaced region for the construction of TK1402 $\Delta$ alpB/alpB<sub>1402</sub>V, TK1402 $\Delta$ alpB/alpB<sub>11638</sub>V, TK1402 $\Delta$ alpB/alpB<sub>1029</sub>V and TK1402 $\Delta$ alpB/alpB<sub>2003</sub>V is shown in a box.

Fig. S1

(A) TK1029

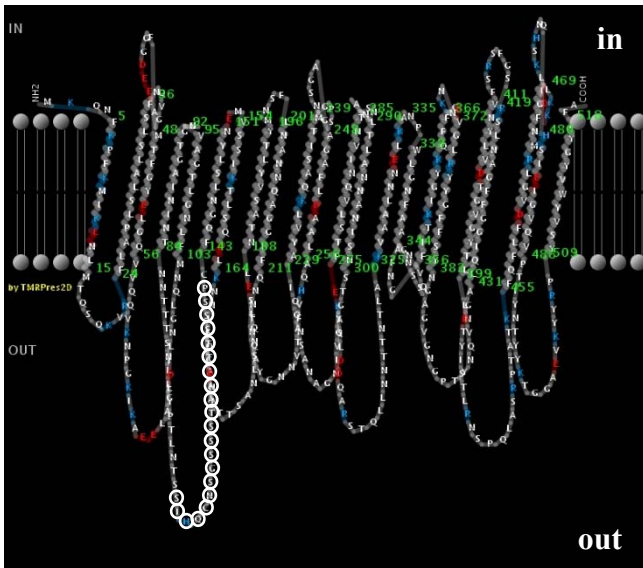

(B) KR2003

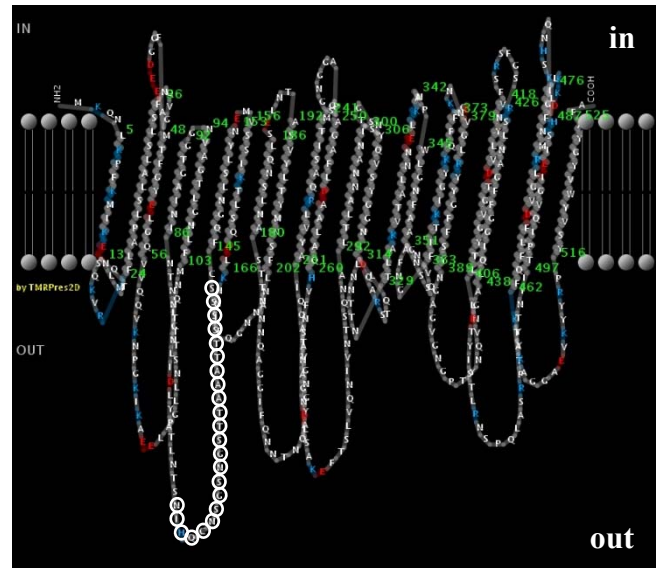

(C) TK1402 $\Delta$ *alpB*/*alpB*<sub>11638</sub>

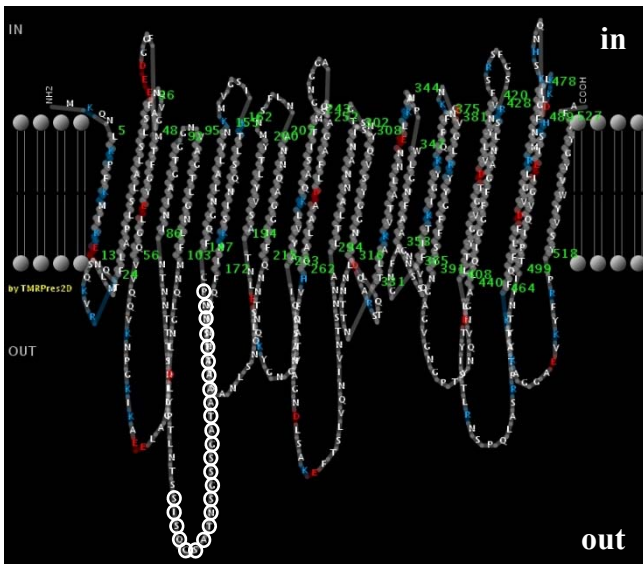

(D) TK1402 $\Delta$ *alpB*/*alpB*<sub>1029</sub>

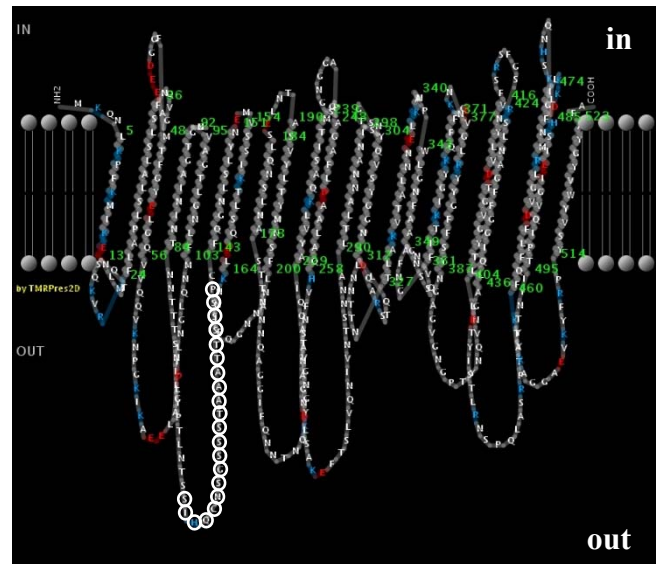

(E) TK1402 $\Delta$ *alpB*/*alpB*<sub>2003</sub>

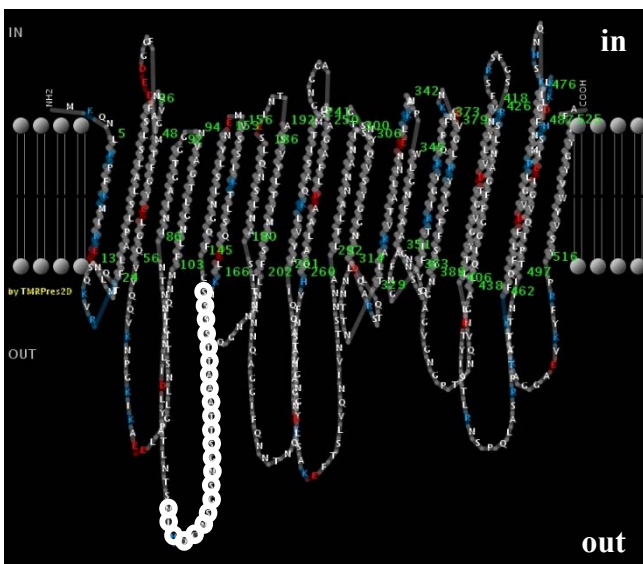

Two-dimensional structure of AlpB from strains TK1029 (A), KR2003 (B), TK1402 $\Delta$ *alpB*/*alpB*<sub>11638</sub> (C), TK1402 $\Delta$ *alpB*/*alpB*<sub>1029</sub> (D), and TK1402 $\Delta$ *alpB*/*alpB*<sub>2003</sub> (E), based on the prediction by PRED-TM3B. The amino acids of the variable region are shown by white circles. Strains TK1402 $\Delta$ *alpB*/*alpB*<sub>11638</sub>, TK1402 $\Delta$ *alpB*/*alpB*<sub>1029</sub> and TK1402 $\Delta$ *alpB*/*alpB*<sub>2003</sub> were restored strains derived from the TK1402 *alpB* mutant restored with NCTC11638, TK1029 or KR2003 *alpB*, respectively.

Fig. S2
